# Supplementary material
Source: Springer Nature journal article supplement (https://www.springermedizin.de/resource/supplementary/13006_2014_180_MOESM2_ESM.pdf/9628148)

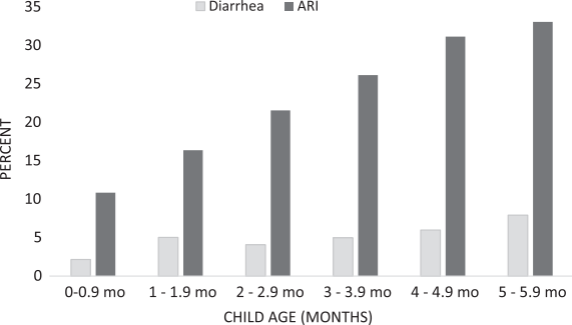

Supplement: MOESM2 [file 9628148]
